# Supplementary material for: The Equine Faecal Microbiota of Healthy Horses and Ponies in The Netherlands: Impact of Host and Environmental Factors
Source: MDPI journal article supplement (doi:10.3390/ani11061762), 2021-06-12

**Supplementary Figure S1** Relative abundance of bacterial communities at (A) phylum- and (B) class level in the microbiota of fecal samples collected from ponies at different time points after exposure to air. The phylum of Bacteroidetes decreased in relative abundance at t=12h and t=24h compared to t=0, while Firmicutes increased. At class level Bacilli increased after 12h of air exposure.

(A)

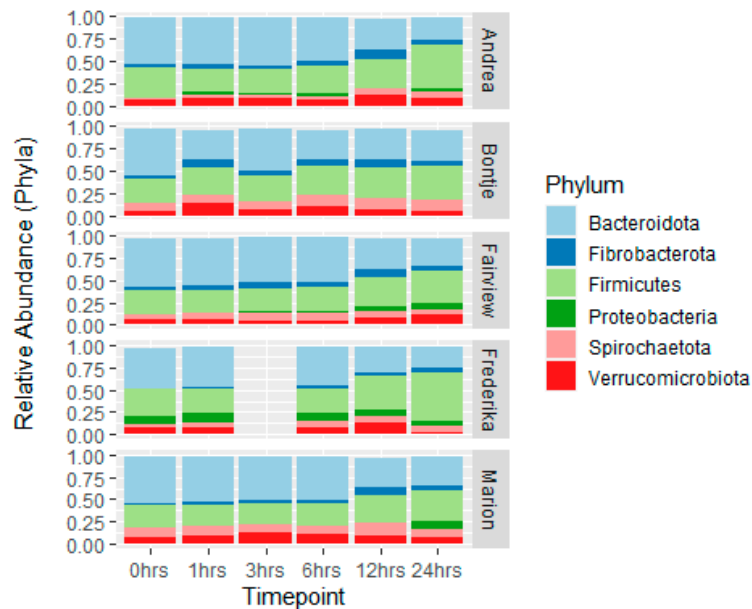

(B)

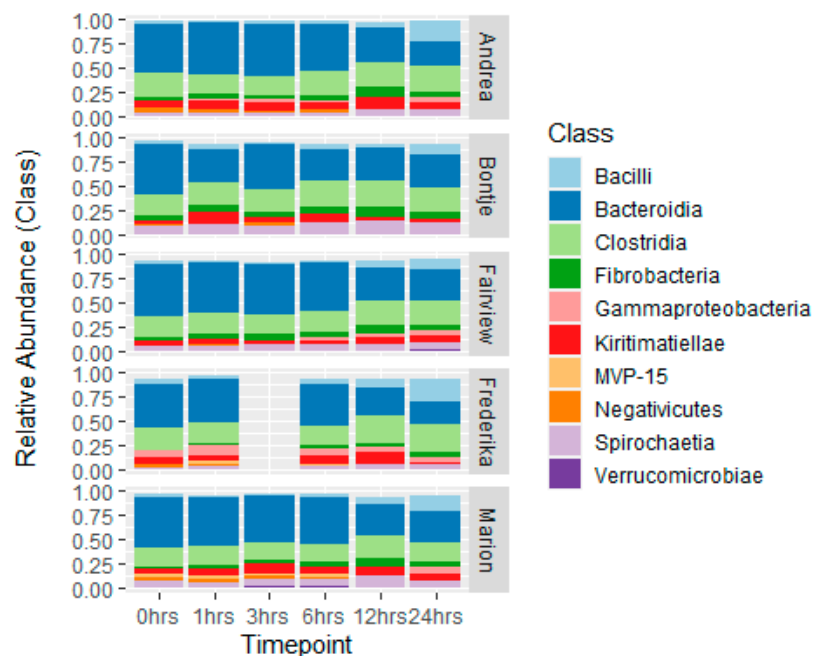

**Supplementary Figure S2.** Relative abundance of most abundant phyla and classes in the fecal microbiota of 79 horses and ponies in the Netherlands. (A) 61 equids at farm I and 18 equids at farm II - phylum level (B) 61 equids at farm II and 18 equids at farm II – class level

(A)

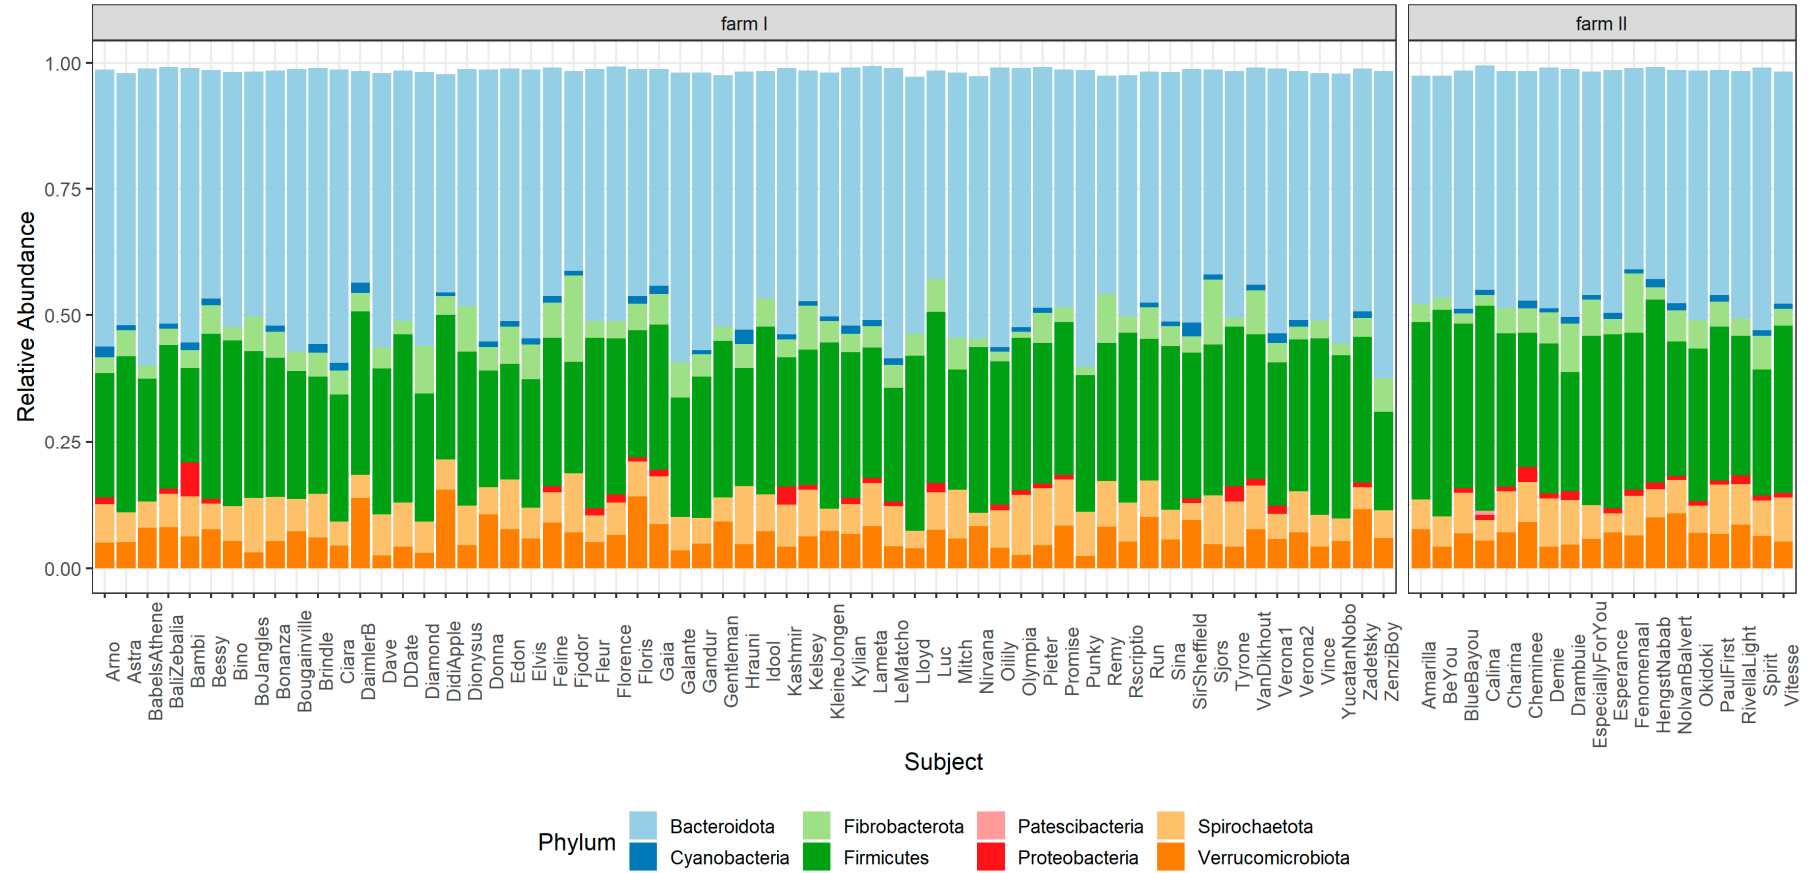

(B)

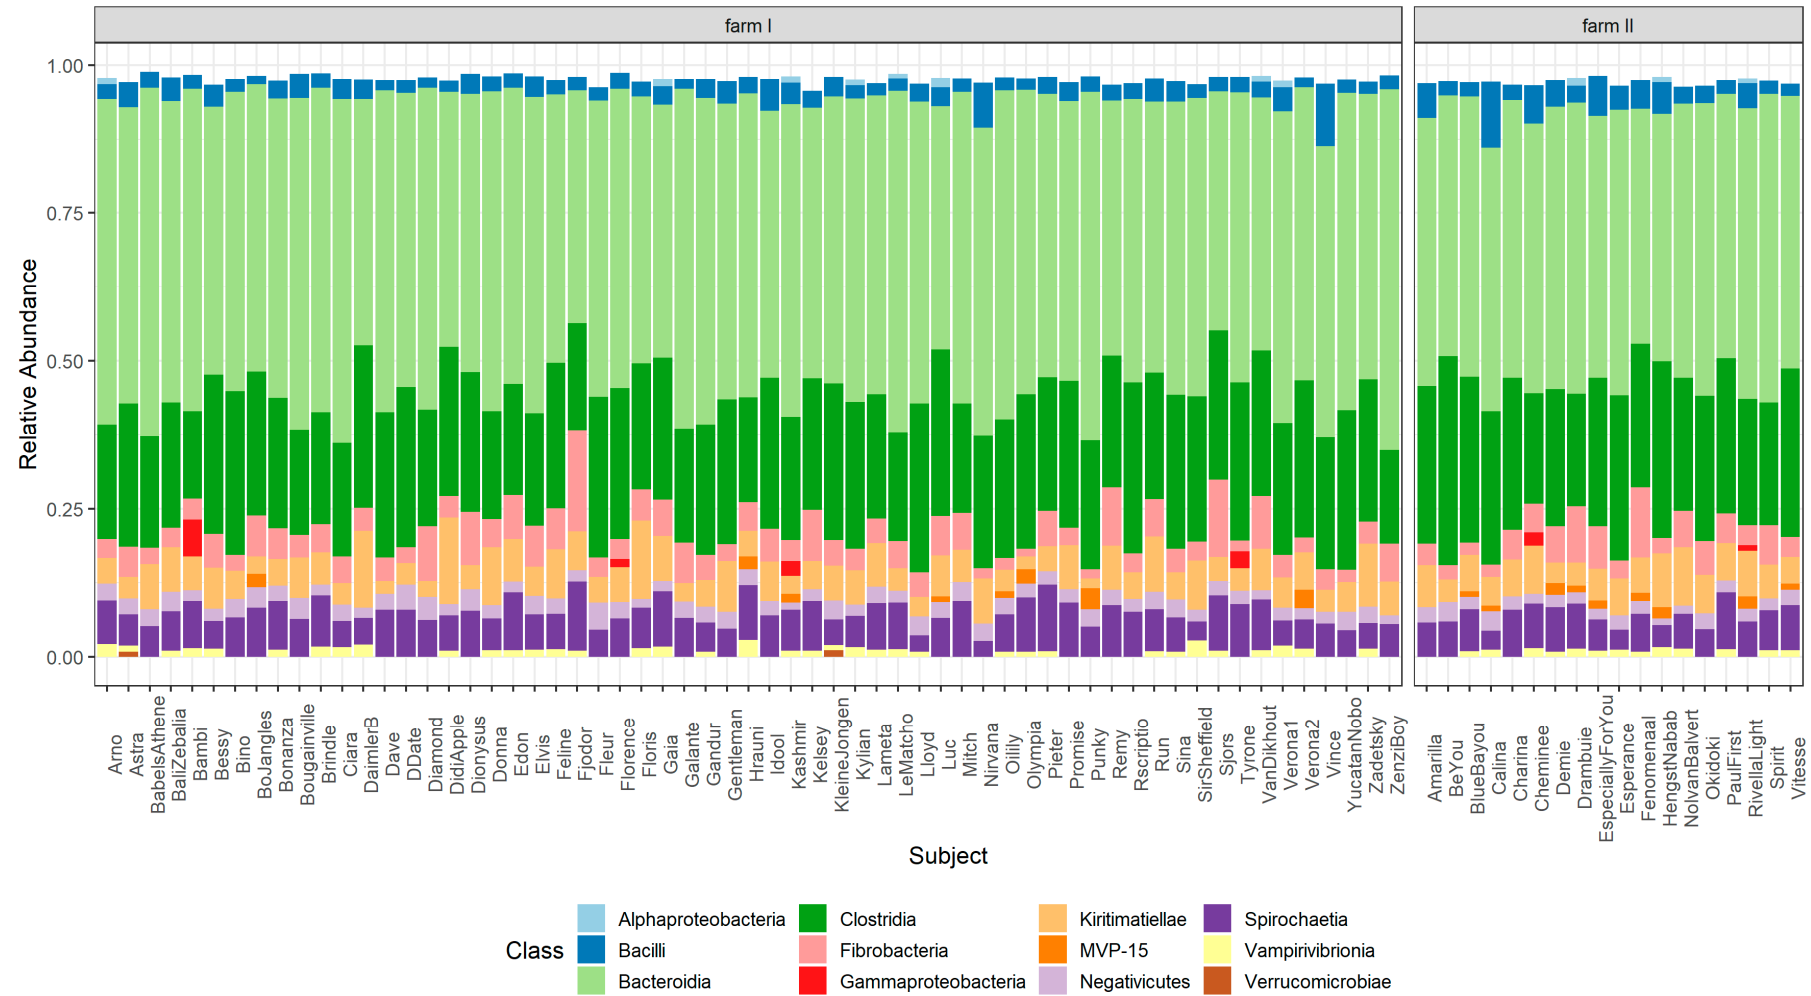

Supplement: s1 [file s1]
